# Supplementary material for: Analytical flow duration curves for summer streamflow in Switzerland
Source: Copernicus journal article supplement (doi:10.5194/hess-22-2377-2018), 2018-04-20
Supplement: Supplementary file 1 [file hess-22-2377-2018-supplement.zip]

# Inference of analytical flow duration curves in Swiss alpine environments

Ana Clara Santos<sup>1,2</sup>, Maria Manuela Portela<sup>2</sup>, Andrea Rinaldo<sup>1,4</sup>, and Bettina Schaefli<sup>1,3</sup>

<sup>1</sup>School of Architecture, Civil and Environmental Engineering (ENAC), École Polytechnique Fédérale de Lausanne (EPFL), Switzerland

<sup>2</sup>Instituto Superior Técnico, Technical University of Lisbon, Lisbon, Portugal

<sup>3</sup>Faculty of Geosciences and Environment, University of Lausanne

<sup>4</sup>Dipartimento di Ingegneria Civile Edile e Ambientale, Università degli studi di Padova

## Contents

The supplementary material contains 3 tables, 2 figures and graphics showing the cdf model performance for all catchments including the linear and nonlinear model. Additional shape files with the catchments contour can also be found attached. The tables and figures show:

- 5
  - Table 1: Percentage of land use per catchment.
  - Figure 1: Interception per type of land use.
  - Table 2: Spatial data classes associated to FOEN land use classes.
  - Figure 2: Equivalence between the 16 discharge regimes from the Hydrological Atlas of Switzerland and the 3 types of regimes adopted.
- 10
  - Table 3: Precipitation grid cells per catchment.
  - Table 4: Summary of data sources.

**Table 1.** Percentge of land use per catchment. Data was obtained from the dataset associated to the “hydrological study area” (Aschwanden, 1996) except for the catchments: Areuse, Rhône-Gletch and Venoge, for which data was obtained from spatial data (Statistics, 2001), see Tab. 2. Each column is identified by a letter that correspond to a type of land use, identified on Fig. 1.

| Catchment          | A     | B     | C     | D    | E     | F     | G    | H     | I    | J    | K    | L     | M    | N    | O     |
|--------------------|-------|-------|-------|------|-------|-------|------|-------|------|------|------|-------|------|------|-------|
| Rein da Sumvitg    | 0,14  | 1,66  | 0,09  | 0,00 | 0,00  | 19,26 | 0,00 | 23,49 | 0,00 | 0,00 | 0,00 | 47,01 | 0,09 | 1,61 | 6,65  |
| Dischmabach        | 2,38  | 1,87  | 0,23  | 0,00 | 0,46  | 37,80 | 0,00 | 20,89 | 0,05 | 0,00 | 0,28 | 33,50 | 0,13 | 0,35 | 2,06  |
| Goldach            | 29,64 | 0,00  | 4,37  | 3,04 | 51,06 | 0,80  | 0,46 | 0,14  | 5,97 | 0,60 | 3,44 | 0,08  | 0,02 | 0,38 | 0,00  |
| Necker             | 33,61 | 0,00  | 3,80  | 0,50 | 47,63 | 10,14 | 0,06 | 0,57  | 1,65 | 0,07 | 1,38 | 0,14  | 0,00 | 0,45 | 0,00  |
| Sitter             | 25,13 | 0,13  | 2,94  | 0,05 | 24,08 | 31,84 | 0,04 | 4,99  | 1,30 | 0,03 | 1,16 | 7,24  | 0,19 | 0,80 | 0,08  |
| Murg               | 30,58 | 0,00  | 2,87  | 3,83 | 51,62 | 0,82  | 0,26 | 0,00  | 4,64 | 0,71 | 4,07 | 0,24  | 0,13 | 0,23 | 0,00  |
| Scheulte           | 47,75 | 0,00  | 3,97  | 1,00 | 26,59 | 17,81 | 0,07 | 0,14  | 1,31 | 0,00 | 1,17 | 0,07  | 0,00 | 0,12 | 0,00  |
| Gürbe              | 21,95 | 0,28  | 2,55  | 2,69 | 53,84 | 7,75  | 0,11 | 2,00  | 3,69 | 0,28 | 2,40 | 1,43  | 0,28 | 0,75 | 0,00  |
| Rotenbach          | 12,12 | 0,00  | 12,12 | 0,00 | 0,00  | 71,51 | 0,00 | 0,61  | 0,61 | 0,00 | 0,00 | 1,82  | 0,00 | 1,21 | 0,00  |
| Sense              | 32,34 | 0,06  | 3,65  | 1,17 | 36,38 | 17,94 | 0,07 | 2,07  | 1,84 | 0,10 | 1,51 | 1,56  | 0,14 | 1,17 | 0,00  |
| Areuse             | 44,02 | 0,00  | 4,04  | 0,14 | 26,51 | 20,15 | 0,16 | 0,25  | 0,67 | 2,07 | 0,17 | 0,17  | 1,53 | 0,13 | 0,00  |
| Ilfis              | 44,27 | 0,14  | 4,45  | 0,55 | 31,46 | 14,07 | 0,06 | 0,87  | 1,21 | 0,09 | 1,26 | 0,71  | 0,00 | 0,86 | 0,00  |
| Sellenbodenbach    | 10,66 | 0,00  | 3,52  | 5,14 | 72,69 | 0,00  | 0,19 | 0,00  | 4,47 | 0,29 | 3,04 | 0,00  | 0,00 | 0,00 | 0,00  |
| Alpbach            | 1,51  | 6,56  | 0,15  | 0,00 | 0,00  | 5,73  | 0,00 | 10,20 | 0,00 | 0,00 | 0,00 | 46,97 | 0,22 | 0,99 | 27,67 |
| Grosstalbach       | 17,89 | 1,48  | 2,71  | 0,00 | 4,73  | 25,26 | 0,00 | 9,55  | 0,23 | 0,05 | 0,09 | 28,01 | 0,00 | 0,75 | 9,25  |
| Alp                | 48,51 | 0,00  | 3,62  | 0,00 | 30,56 | 9,94  | 0,19 | 1,29  | 2,59 | 0,41 | 1,36 | 0,84  | 0,00 | 0,69 | 0,00  |
| Rhone              | 0,00  | 2,81  | 0,13  | 0,00 | 0,00  | 8,79  | 0,00 | 0,51  | 9,42 | 0,03 | 0,00 | 29,69 | 0,43 | 0,05 | 48,15 |
| Massa              | 0,68  | 0,03  | 0,15  | 0,00 | 0,00  | 2,87  | 0,00 | 3,52  | 0,00 | 0,00 | 0,00 | 26,74 | 0,01 | 0,07 | 65,93 |
| Venoge             | 31,04 | 0,00  | 1,88  | 1,74 | 54,20 | 2,30  | 0,83 | 0,16  | 0,18 | 4,17 | 0,28 | 0,09  | 3,12 | 0,02 | 0,00  |
| Melera             | 86,27 | 0,00  | 0,99  | 0,00 | 0,00  | 10,78 | 0,00 | 1,96  | 0,00 | 0,00 | 0,00 | 0,00  | 0,00 | 0,00 | 0,00  |
| Verzasca           | 28,78 | 12,67 | 3,31  | 0,00 | 0,80  | 8,02  | 0,02 | 25,04 | 0,30 | 0,01 | 0,10 | 18,95 | 0,06 | 1,94 | 0,00  |
| Riale di Calneggia | 6,87  | 6,71  | 3,94  | 0,00 | 0,05  | 8,93  | 0,00 | 18,23 | 0,04 | 0,00 | 0,00 | 52,51 | 1,40 | 1,32 | 0,00  |
| Krummbach          | 0,25  | 0,00  | 1,01  | 0,00 | 0,00  | 55,89 | 0,00 | 12,15 | 0,05 | 0,00 | 0,66 | 25,25 | 0,50 | 1,21 | 3,03  |
| Poschiavino        | 6,35  | 1,07  | 2,14  | 0,00 | 0,00  | 48,50 | 0,00 | 12,62 | 0,30 | 0,00 | 1,85 | 25,18 | 0,10 | 1,54 | 0,35  |
| Ova da Cluozza     | 5,07  | 12,78 | 0,60  | 0,00 | 0,00  | 0,00  | 0,00 | 12,07 | 0,00 | 0,00 | 0,00 | 66,91 | 0,01 | 0,33 | 2,23  |

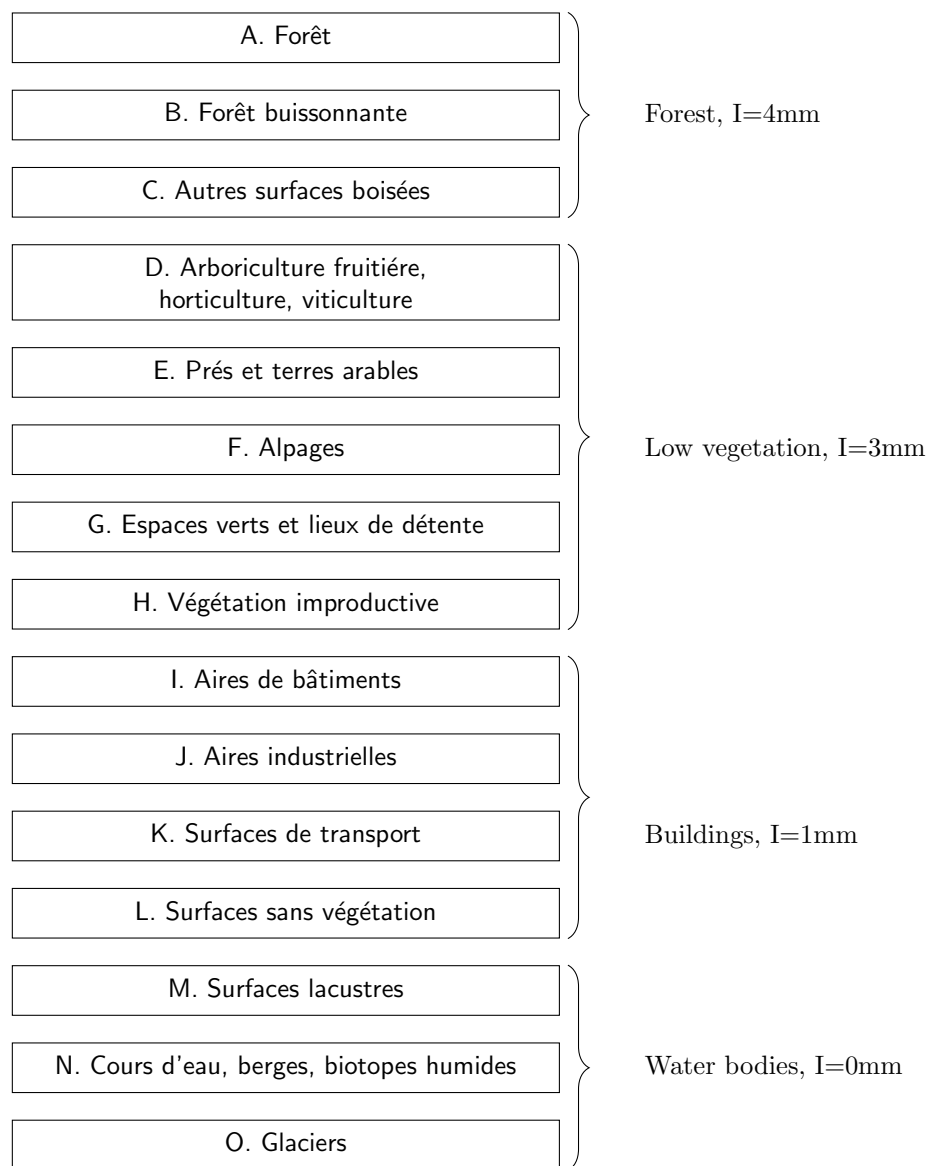

**Figure 1.** Equivalence between the land use categories proposed by the FOEN and the ones adopted to calculate interception, followed by the value of interception for each category.

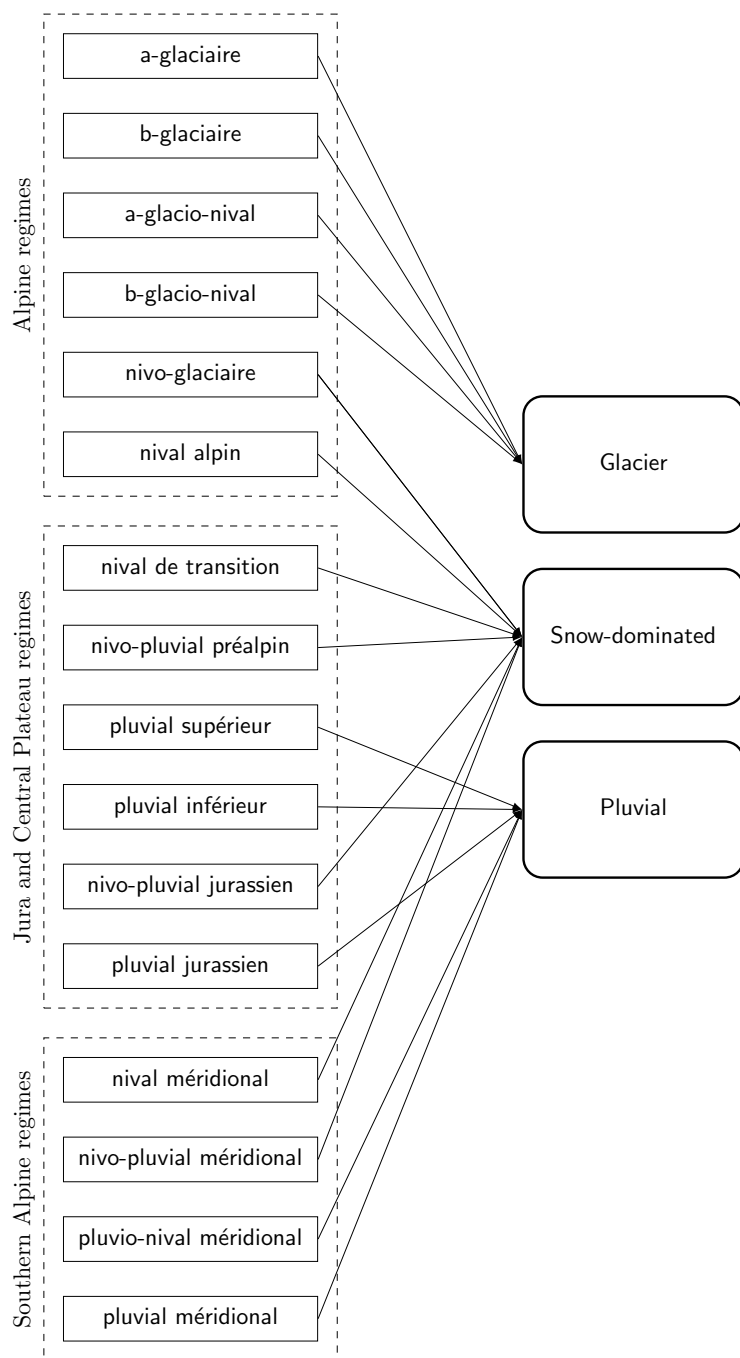

**Figure 2.** Equivalence between the 16 discharge regimes from the Hydrological Atlas of Switzerland and the simplified classification in 3 types of regimes adopted in this work.

**Table 2.** Spatial data classes (FSO, 2001) associated to FOEN land use classes (Aschwanden, 1996).

| ID own | FOEN land use hydrological study areas             | Geostat1997 classes associated to this FOEN class |
|--------|----------------------------------------------------|---------------------------------------------------|
| A      | Forêt                                              | 9, 10, 11, 12, 13, 14                             |
| B      | Forêt buissonnante                                 | 15                                                |
| C      | Autres surfaces boisées                            | 17, 18, 19                                        |
| D      | Arboriculture fruitière, horticulture, viticulture | 71, 72, 75, 76, 77, 78                            |
| E      | Prés et terres arables                             | 73, 81, 82, 83, 84                                |
| F      | Alpages                                            | 85, 86, 87, 88, 89                                |
| G      | Végétation improductive                            | 16, 95, 96, 97, 98                                |
| H      | Aires de bâtiments                                 | 25,26, 27, 28, 29, 45, 46, 47, 48, 49             |
| I      | Aires industrielles                                | 21, 41                                            |
| J      | Espaces verts et lieux de détente                  | 23, 51, 52, 53, 54, 56, 59                        |
| K      | Surfaces de transport                              | 31, 32, 33, 34, 35, 36, 37, 38, 68, 67            |
| L      | Surfaces lacustres                                 | 91                                                |
| M      | Cours d'eau, berges, biotopes humides              | 92, 93, 69                                        |
| N      | Surfaces sans végétation                           | 99                                                |
| O      | Glaciers                                           | 90                                                |

**Table 3.** Selected precipitation grid cells of the MeteoSwiss RhiresData (MeteoSwiss, 2014a) per catchment.

| Catchment          | Cells                                                                                                                                                                                                                                                                                                                                                                                                                                                                                                                                                                                                            |
|--------------------|------------------------------------------------------------------------------------------------------------------------------------------------------------------------------------------------------------------------------------------------------------------------------------------------------------------------------------------------------------------------------------------------------------------------------------------------------------------------------------------------------------------------------------------------------------------------------------------------------------------|
| Rein da Sumvitg    | 15923; 16026; 16128; 16129; 16231; 16232; 16233                                                                                                                                                                                                                                                                                                                                                                                                                                                                                                                                                                  |
| Dischmabach        | 20448; 20449; 20551; 20552; 20553; 20655; 20657; 20759; 20760                                                                                                                                                                                                                                                                                                                                                                                                                                                                                                                                                    |
| Goldach            | 18150; 18252; 18253; 18254; 18355; 18356; 18357; 18358; 18459; 18460; 18461; 18562; 18563; 18564; 18666                                                                                                                                                                                                                                                                                                                                                                                                                                                                                                          |
| Necker             | 16712; 16713; 16816; 16817; 16818; 16919; 16920; 16921; 17022; 17023; 17024; 17025; 17125; 17126; 17127; 17128; 17228; 17229; 17230; 17231; 17331; 17333; 17334; 17437                                                                                                                                                                                                                                                                                                                                                                                                                                           |
| Sitter             | 17745; 17746; 17848; 17849; 17850; 17951; 17952; 17953; 18054; 18055; 18156; 18157; 18158; 18258; 18259; 18260; 18361; 18362; 18363; 18465; 18466                                                                                                                                                                                                                                                                                                                                                                                                                                                                |
| Murg               | 15679; 15782; 15783; 15882; 15883; 15884; 15885; 15886; 15887; 15984; 15985; 15986; 15987; 15988; 15989; 16088; 16089; 16090; 16091; 16191; 16193; 16294; 16396                                                                                                                                                                                                                                                                                                                                                                                                                                                  |
| Scheulte           | 8370; 8371; 8472; 8473; 8474; 8575; 8576; 8577; 8678; 8679; 8680; 8681; 8781; 8782; 8783; 8885; 8886; 8988; 8989                                                                                                                                                                                                                                                                                                                                                                                                                                                                                                 |
| Gürbe              | 8502; 8503; 8598; 8599; 8600; 8601; 8602; 8604; 8605; 8606; 8701; 8702; 8703; 8704; 8705; 8706; 8707; 8708; 8709; 8805; 8806; 8807; 8808; 8809; 8810; 8811; 8812; 8909; 8911; 8912; 8913; 8914; 8915                                                                                                                                                                                                                                                                                                                                                                                                             |
| Rotenbach          | 7577                                                                                                                                                                                                                                                                                                                                                                                                                                                                                                                                                                                                             |
| Sense              | 7475; 7476; 7477; 7574; 7575; 7576; 7577; 7578; 7579; 7676; 7677; 7678; 7679; 7680; 7681; 7682; 7776; 7777; 7778; 7779; 7780; 7781; 7782; 7783; 7784; 7877; 7878; 7879; 7880; 7881; 7882; 7883; 7884; 7885; 7886; 7887; 7980; 7981; 7982; 7983; 7984; 7985; 7986; 7987; 7988; 7989; 7990; 8082; 8083; 8084; 8085; 8086; 8087; 8088; 8089; 8090; 8091; 8092; 8185; 8186; 8187; 8188; 8189; 8190; 8191; 8192; 8193; 8194; 8195; 8391; 8392; 8393; 8394; 8395; 8396; 8397; 8398; 8399; 8400; 8495; 8496; 8497; 8498; 8499; 8500; 8501; 8603                                                                         |
| Areuse             | 3346; 3348; 3445; 3451; 3452; 3451; 3452; 3453; 3454; 3455; 3651; 3652; 3653; 3657; 3753; 3754; 3757; 3758; 3856; 3857; 3858; 3859; 3860; 3861; 3959; 3960; 3961; 3962; 3963; 3964; 4061; 4062; 4063; 4064; 4065; 4066; 4164; 4165; 4166; 4167; 4168; 4169; 4267; 4268; 4269; 4270; 4271; 4272; 4369; 4370; 4371; 4372; 4373; 4374; 4471; 4472; 4473; 4474; 4475; 4476; 4477; 4574; 4575; 4576; 4577; 4578; 4579; 4677; 4678; 4679; 4680; 4681; 4681; 4780; 4781; 4782; 4783; 4784; 4883; 4884; 4885; 4886; 4887; 4986; 4987; 4988; 4989; 4990; 5089; 5090; 5091; 5092; 5191; 5192; 5195; 5294; 5298; 5396; 5397 |
| Ilfis              | 10241; 10242; 10243; 10244; 10343; 10344; 10345; 10346; 10347; 10348; 10447; 10448; 10449; 10450; 10451; 10549; 10550; 10551; 10552; 10553; 10554; 10555; 10556; 10557; 10652; 10653; 10654; 10655; 10656; 10657; 10658; 10659; 10660; 10755; 10756; 10757; 10758; 10759; 10760; 10761; 10762; 10763; 10858; 10859; 10863; 10864; 10865; 10866; 10966; 10967; 10968; 11070; 11071                                                                                                                                                                                                                                |
| Sellenbodenbach    | 12090; 12192; 12193                                                                                                                                                                                                                                                                                                                                                                                                                                                                                                                                                                                              |
| Alpbach            | 13854; 13855; 13957; 13958; 14060; 14061                                                                                                                                                                                                                                                                                                                                                                                                                                                                                                                                                                         |
| Grosstalbach       | 13541; 13542; 13644; 13645; 13646; 13746; 13747; 13748; 13749; 13849; 13852                                                                                                                                                                                                                                                                                                                                                                                                                                                                                                                                      |
| Alp                | 14564; 14664; 14665; 14666; 14667; 14766; 14767; 14768; 14769; 14770; 14868; 14869                                                                                                                                                                                                                                                                                                                                                                                                                                                                                                                               |
| Rhone              | 13039; 13040; 13041; 13042; 13141; 13142; 13143; 13144; 13145; 13244; 13245; 13248                                                                                                                                                                                                                                                                                                                                                                                                                                                                                                                               |
| Massa              | 10783; 10882; 10885; 10886; 10985; 10986; 10987; 10988; 10989; 11086; 11087; 11088; 11089; 11090; 11091; 11092; 11189; 11190; 11191; 11192; 11193; 11194; 11195; 11196; 11292; 11293; 11294; 11295; 11296; 11297; 11298; 11299; 11395; 11396; 11397; 11398; 11399; 11400; 11401; 11402; 11498; 11499; 11500; 11501; 11502; 11503; 11504; 11603; 11604; 11605; 11606; 1709                                                                                                                                                                                                                                        |
| Venoge             | 2844; 2946; 2947; 2948; 3048; 3049; 3050; 3051; 3150; 3152; 3153; 3154; 3253; 3254; 3255; 3256; 3355; 3356; 3357; 3358; 3458; 3459; 3460; 3461; 3561; 3562; 3563; 3564; 3565; 3665; 3666; 3667; 3668; 3669; 3670; 3768; 3769; 3770; 3771; 3772; 3773; 3871; 3872; 3873; 3874; 3875; 3979; 3974; 3975; 3976; 3977; 3978; 3979; 4077; 4078; 4079; 4080; 4082                                                                                                                                                                                                                                                       |
| Melera             | 16562                                                                                                                                                                                                                                                                                                                                                                                                                                                                                                                                                                                                            |
| Verzasca           | 14701; 14702; 14803; 14804; 14805; 14904; 14905; 14906; 14907; 14908; 14909; 15007; 15008; 15009; 15010; 15011; 15012; 15111; 15112; 15113; 15114; 15115; 15116; 15117; 15214; 15215; 15216; 15217; 15218; 15219; 15220; 15318; 15319; 15320; 15321; 15322; 15323; 15423; 15424; 15425; 15526; 15527; 15528; 15529; 15630; 15631; 15632; 15735                                                                                                                                                                                                                                                                   |
| Riale di Calneggia | 13566; 13567; 13669; 13670; 13773; 13876                                                                                                                                                                                                                                                                                                                                                                                                                                                                                                                                                                         |
| Krummbach          | 11203; 11204; 11205; 11306; 11307                                                                                                                                                                                                                                                                                                                                                                                                                                                                                                                                                                                |
| Poschiavino        | 21288; 21289; 21392                                                                                                                                                                                                                                                                                                                                                                                                                                                                                                                                                                                              |
| Ova da Cluozza     | 21586; 21587; 21588; 21689; 21690; 21691                                                                                                                                                                                                                                                                                                                                                                                                                                                                                                                                                                         |

**Table 4.** Sources of the data used in this work.

| Type of data             | All catchments   | Source                                                                                                            |
|--------------------------|------------------|-------------------------------------------------------------------------------------------------------------------|
| Daily discharge          | All catchments   | FOEN (on demand)                                                                                                  |
| Daily precipitation      | All catchments   | MeteoSwiss (Rhires D) ( <a href="http://www.meteoswiss.admin.ch">www.meteoswiss.admin.ch</a> - requires contract) |
| Daily temperature        | All catchments   | MeteoSwiss (Tabs D) ( <a href="http://www.meteoswiss.admin.ch">www.meteoswiss.admin.ch</a> - requires contract)   |
| Elevations of catchments | All catchments   | FOEN ( <a href="http://www.hydrodaten.admin.ch">www.hydrodaten.admin.ch</a> )                                     |
| Land use                 | Study areas      | Aschwanden, 1996                                                                                                  |
|                          | Other catchments | FSO, 2001                                                                                                         |
| Regimes                  | Study areas      | Aschwanden, 1996                                                                                                  |
|                          | Other catchments | FOEN ( <a href="http://map.geo.admin.ch">map.geo.admin.ch</a> )                                                   |

## Results for all catchments for the linear model

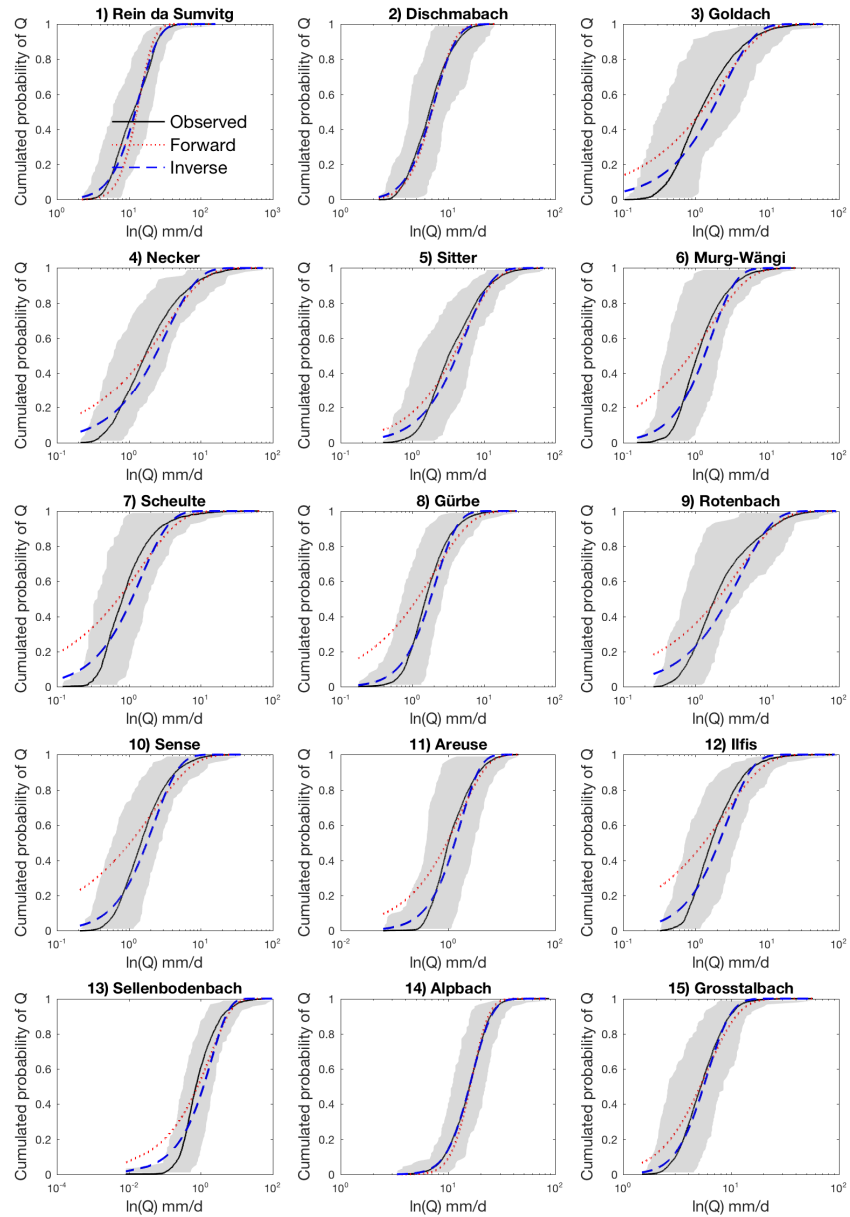

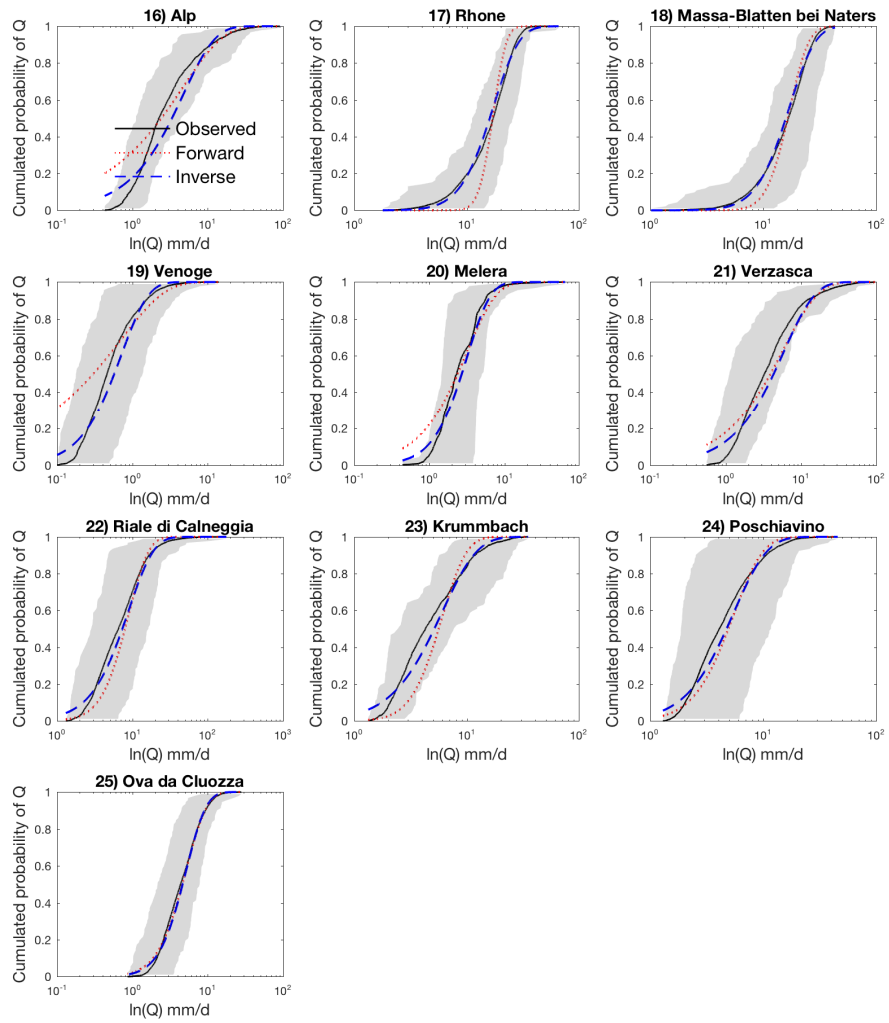

## Results for all catchments for the nonlinear model

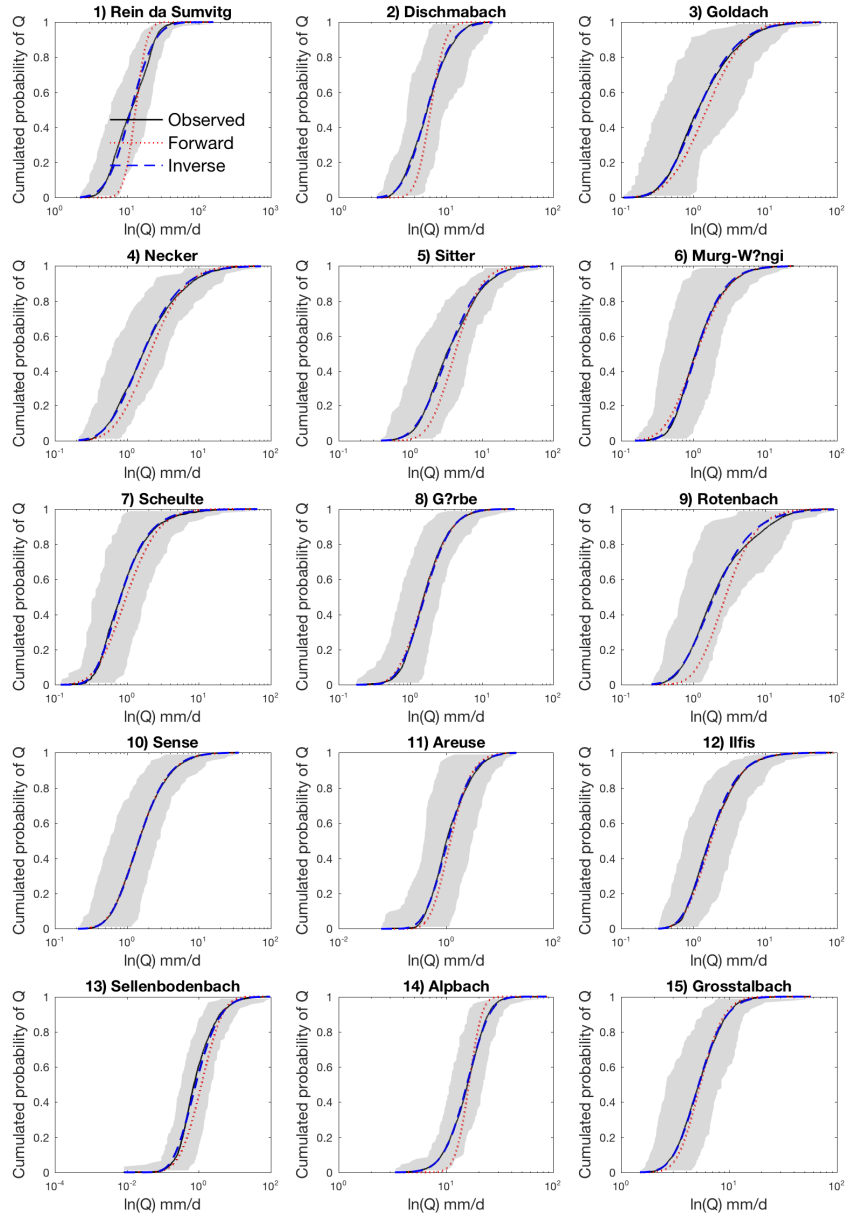

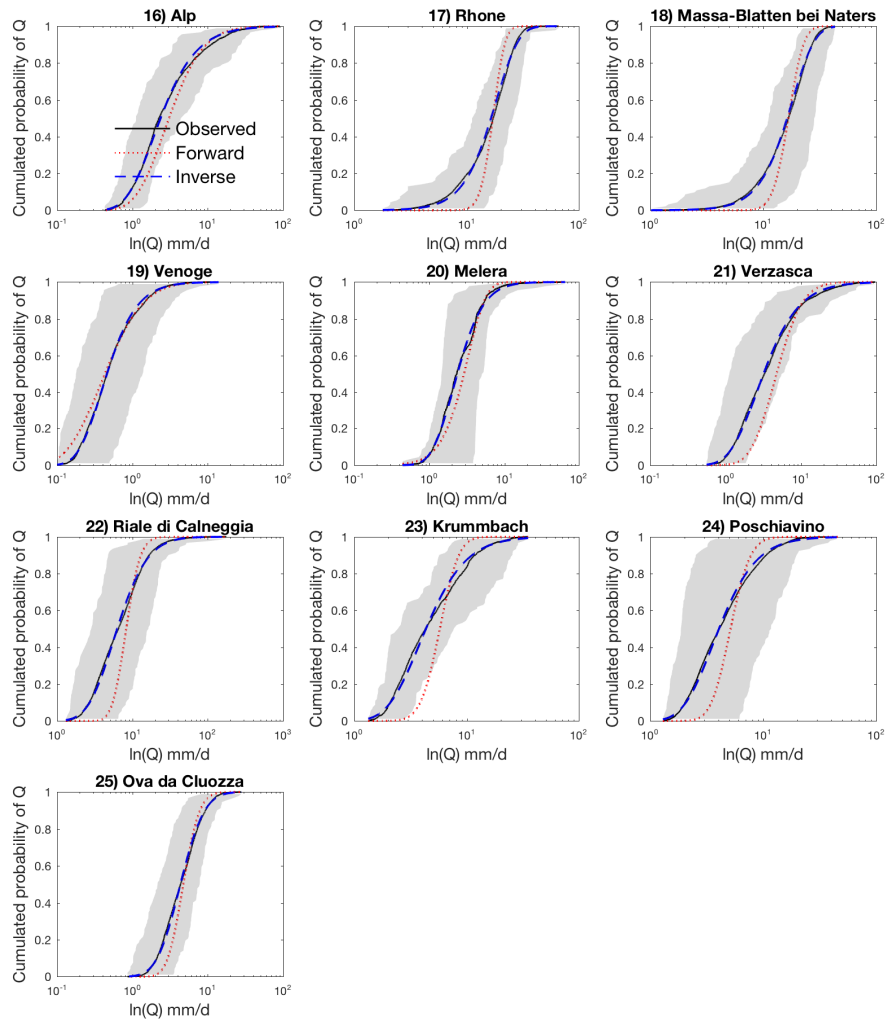

## References

- Aschwanden, A.: Caractéristiques physiographiques des bassins de recherches hydrologiques en Suisse, 1996.
- FOEN: Hydrological data and forecasts, <https://www.hydrodaten.admin.ch/en/stations-and-data.html>, 2017.
- F S O.: Geostat - Version 1997, Swiss spatial land use statistics data-base, Bern, Switzerland, 2001.
- 5 – MeteoSwiss: Daily Precipitation (final analysis): RhiresD, 2014a.
- MeteoSwiss: Daily Temperature (final analysis): TabsD, 2014b.
- Weingartner, R. and Aschwanden, H.: Discharge regime—the basis for the estimation of average flows, Hydrological Atlas of Switzerland, Plate,5, 26, 1992.
