# Supplementary material for: Analytical flow duration curves for summer streamflow in Switzerland
Source: Copernicus journal article supplement (doi:10.5194/hess-22-2377-2018), 2018-04-20
Supplement: Supplementary file 2 [file hess-22-2377-2018-supplement.zip]

Archive with 4 entries (3 files):
- hess-22-2377-2018-supplement-title-page.pdf
- Sup_rev/
- Sup_rev/supplement.pdf
- Sup_rev/ezg_kombiniert.shp
