# Supplementary material for: Analytical flow duration curves for summer streamflow in Switzerland
Source: Copernicus journal article supplement (doi:10.5194/hess-22-2377-2018), 2018-04-20
Supplement: Supplementary file 2 [file hess-22-2377-2018-supplement.zip › hess-22-2377-2018-supplement-title-page.pdf]

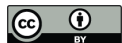

## *Supplement of*

# **Analytical flow duration curves for summer streamflow in Switzerland**

**Ana Clara Santos et al.**

*Correspondence to:* Ana Clara Santos ([anaclara.santos@epfl.ch](mailto:anaclara.santos@epfl.ch))

- [hess-22-2377-2018-supplement-title-page.pdf](#)
- [Sup\\_rev](#)
  - [ezg\\_kombiniert.shp](#)
  - [supplement.pdf](#)

The copyright of individual parts of the supplement might differ from the CC BY 4.0 License.
